# Supplementary material for: Association of vitamin D3 and its metabolites in patients with and without type 2 diabetes and their relationship to diabetes complications
Source: PubMed Central journal article supplement — Ther Adv Chronic Dis. 2020 Sep 26;11:2040622320924159. doi: 10.1177/2040622320924159 (PMC7534081; doi:10.1177/2040622320924159), 2020-09-26
Supplement: R1_Supp_Table_1_Vit_D_Metabolites.pdf [file R1_Supp_Table_1_Vit_D_Metabolites.pdf]

**Supplementary Table 1. Validation of Vitamin D metabolite measurements.**

Analyses for all 8 Vitamin D metabolites were validated for LOQ, linearity, accuracy, repeatability, reproducibility and robustness. All analytes showed good recoveries with acceptable accuracy and within  $\pm 15\%$  reproducibility.

| <b>Vitamin D Metabolites</b>            | <b>LOQ</b> | <b>Linearity Range</b> | <b>Accuracy</b> | <b>Reproducibility CV%</b> |
|-----------------------------------------|------------|------------------------|-----------------|----------------------------|
| 25(OH)D <sub>3</sub>                    | 0.5 ng/mL  | 0.5-100 ng/mL          | 102-118%        | 6.80                       |
| 25(OH)D <sub>2</sub>                    | 0.25 ng/mL | 0.25-50 ng/mL          | 97-112%         | 13.26                      |
| 24-R-25(OH) <sub>2</sub> D <sub>2</sub> | 0.05 ng/mL | 0.05-10 ng/mL          | 92-101%         | 7.47                       |
| 24-R-25(OH) <sub>2</sub> D <sub>3</sub> | 0.05 ng/mL | 0.05-10 ng/mL          | 94-102%         | 5.68                       |
| 3-epi-25(OH)D <sub>2</sub>              | 0.05 ng/mL | 0.05-10 ng/mL          | 97-104%         | 10.25                      |
| 1,25(OH) <sub>2</sub> D <sub>3</sub>    | 0.01 ng/mL | 0.01-0.20 ng/mL        | 89-105%         | 12.26                      |
| 1,25(OH) <sub>2</sub> D <sub>2</sub>    | 0.01 ng/mL | 0.01-0.20 ng/mL        | 90-100%         | 13.90                      |
| 3-epi-25(OH)D <sub>3</sub>              | 0.05 ng/mL | 0.05-10 ng/mL          | 67-106%         | 13.72                      |

LOQ, limit of quantification; CV, coefficient of variation.
